# Supplementary material for: Off-Label Use of Tenecteplase for the Treatment of Acute Ischemic Stroke: A Systematic Review and Meta-analysis
Source: PubMed Central journal article supplement (PMC8972028; doi:10.1001/jamanetworkopen.2022.4506), 2022-03-31

## Supplementary Online Content

Katsanos AH, Psychogios K, Turc G, et al. Off-label use of tenecteplase for the treatment of acute ischemic stroke: a systematic review and meta-analysis. *JAMA Netw Open*. 2022;5(3):e224506. doi:10.1001/jamanetworkopen.2022.4506

**eTable 1.** Definition of Successful Recanalization in Patients With Confirmed Intracranial Vessel Occlusion Across Included Studies

**eTable 2.** Definition of Early Neurological Improvement at 24h Across Included Studies

**eTable 3.** Adjustment for Potential Confounders Across Included Studies

**eTable 4.** Quality Assessment of Included Studies With the Newcastle-Ottawa Scale

**eFigure 1.** Unadjusted Analyses on the Comparison Between Tenecteplase and Alteplase for the Outcomes of (A) Symptomatic Intracranial Hemorrhage and (B) Parenchymal Hematoma Following Intravenous Thrombolysis

**eFigure 2.** Adjusted Analyses on the Comparison Between Tenecteplase and Alteplase for the Outcomes of Symptomatic Intracranial Hemorrhage Following Intravenous Thrombolysis

**eFigure 3.** Funnel Plots on the Unadjusted and Adjusted Comparison Between Intravenous Tenecteplase and Alteplase for the Primary Outcome of Interest (Three-Month Good Functional Outcome; Modified Rankin Scale 0-2)

This supplementary material has been provided by the authors to give readers additional information about their work.

**eTable 1:** Definition of successful recanalization in patients with confirmed intracranial vessel occlusion across included studies.

| <b>Study name</b>                   | <b>Definition</b>                                                                                                                                      |
|-------------------------------------|--------------------------------------------------------------------------------------------------------------------------------------------------------|
| Alemseged et al, <sup>1</sup> 2021  | mTICI 2b–3 on initial angiogram (before endovascular therapy was performed) or reperfusion $\geq 50\%$ of the involved territory on multimodal imaging |
| Parsons et al, <sup>2</sup> 2009    | 24-hour CTA or MRA demonstrating partial flow or normal flow using adapted Thrombolysis in Myocardial Infarction (TIMI) criteria (TIMI $\geq 2$ )      |
| Psychogios et al, <sup>3</sup> 2021 | 24-hour CTA or MRA or Transcranial Doppler demonstrating normal flow                                                                                   |
| Seners et al, <sup>4</sup> 2019     | mTICI 2b-3 on pre-mechanical thrombectomy first angiographic run or non-invasive vascular imaging                                                      |
| Mahawish et al, <sup>5</sup> 2021   | N/A                                                                                                                                                    |
| Warrach et al, <sup>6</sup> 2021    | N/A                                                                                                                                                    |

mTICI: modified Thrombolysis in Cerebral Infarction; CTA: computed tomography angiography; MRA: magnetic resonance angiography; TIMI: Thrombolysis in Myocardial Infarction; N/A: not available

**eTable 2:** Definition of early neurological improvement at 24h across included studies.

| <b>Study name</b>                   | <b>Definition</b>                                          |
|-------------------------------------|------------------------------------------------------------|
| Alemseged et al, <sup>1</sup> 2021  | N/A                                                        |
| Parsons et al, <sup>2</sup> 2009    | Reduction in the baseline NIHSS score of at least 8 points |
| Psychogios et al, <sup>3</sup> 2021 | Reduction in the baseline NIHSS score of at least 8 points |
| Seners et al, <sup>4</sup> 2019     | N/A                                                        |
| Mahawish et al, <sup>5</sup> 2021   | N/A                                                        |
| Warrach et al, <sup>6</sup> 2021    | N/A                                                        |

NIHSS: National Institutes of Health Stroke Scale; N/A: not available

**eTable 3:** Adjustment for potential confounders across included studies

| <b>Study name</b>                   | <b>Adjusted variables</b>                                                                                  | <b>Method for adjustment</b>                                                                |
|-------------------------------------|------------------------------------------------------------------------------------------------------------|---------------------------------------------------------------------------------------------|
| Alemseged et al, <sup>1</sup> 2021  | Age, NIHSS score, needle-to-arterial puncture time, cardioembolic etiology                                 | Multivariable regression (selection process for confounders not described)                  |
| Parsons et al, <sup>2</sup> 2009    | Age, NIHSS, serum glucose, infarct core volume, penumbra volume, percent penumbra, TIMI grade 0 (baseline) | Multivariable regression (confounders selected based on p-values from univariable analyses) |
| Psychogios et al, <sup>3</sup> 2021 | Age, baseline NIHSS score, presence of proximal intracranial occlusion                                     | Multivariable regression (a priori defined confounders)                                     |
| Seners et al, <sup>4</sup> 2019     | Age, NIHSS, onset-to-IVT time, occlusion site, thrombus length                                             | Propensity score matching (a priori defined confounders)                                    |
| Mahawish et al, <sup>5</sup> 2021   | Age, sex, pre-morbid mRS, onset-to-door-time, NIHSS, thrombectomy, door-to-needle time                     | Multivariable regression (a priori defined confounders)                                     |
| Warrach et al, <sup>6</sup> 2021    | N/A                                                                                                        | N/A                                                                                         |

NIHSS: National Institutes of Health Stroke Scale; IVT: intravenous thrombolysis; mRS: modified Rankin Scale; TIMI: Thrombolysis in Myocardial Infarction, N/A: not available

**eTable 4:** Quality assessment of included studies with the Newcastle–Ottawa Scale.

| <b>Study name</b>                   | <b>Selection</b> | <b>Comparability</b> | <b>Outcome</b> | <b>Overall score</b> |
|-------------------------------------|------------------|----------------------|----------------|----------------------|
| Alemseged et al, <sup>1</sup> 2021  | ****             | **                   | ***            | 9/9                  |
| Parsons et al, <sup>2</sup> 2009    | ***              | *                    | ***            | 7/9                  |
| Psychogios et al, <sup>3</sup> 2021 | ***              | **                   | **             | 7/9                  |
| Seners et al, <sup>4</sup> 2019     | ***              | **                   | **             | 7/9                  |
| Mahawish et al, <sup>5</sup> 2021   | ***              | **                   | **             | 7/9                  |
| Warrach et al, <sup>6</sup> 2021    | N/A              | N/A                  | N/A            | N/A                  |
| Overall Score                       | 16/20            | 9/10                 | 12/15          | 37/45                |

N/A: not available

## **eReferences:**

1. Alemseged F, Ng FC, Williams C, et al. Tenecteplase vs Alteplase Before Endovascular Therapy in Basilar Artery Occlusion. *Neurology*. 2021;96:e1272-e1277.
2. Parsons MW, Miteff F, Bateman GA, et al. Acute ischemic stroke: imaging-guided tenecteplase treatment in an extended time window. *Neurology*. 2009;72:915-21.
3. Psychogios K, Palaiodimou L, Katsanos AH, et al. Real-world comparative safety and efficacy of tenecteplase versus alteplase in acute ischemic stroke patients with large vessel occlusion. *Ther Adv Neurol Disord*. 2021;14:1756286420986727.
4. Seners P, Caroff J, Chausson N, et al. Recanalization before Thrombectomy in Tenecteplase vs. Alteplase-Treated Drip-and-Ship Patients. *J Stroke*. 2019;21:105-107.
5. Mahawish K, Gommans J, Kleinig T, Lallu B, Tyson A, Ranta A. Switching to Tenecteplase for Stroke Thrombolysis: Real-World Experience and Outcomes in a Regional Stroke Network. *Stroke*. 2021;52:e590-e593.
6. Warach SJ, Miley JT, Mawla M, et al. Abstract P2: Results of a Prospective Observational Cohort Study of Tenecteplase as Standard of Care Stroke Thrombolytic. *Stroke*. 2021;52:AP2. [https://doi.org/10.1161/str.52.suppl\\_1.P2](https://doi.org/10.1161/str.52.suppl_1.P2)

**eFigure 1:** Unadjusted analyses on the comparison between tenecteplase and alteplase for the outcomes of (A) symptomatic intracranial hemorrhage and (B) parenchymal hematoma following intravenous thrombolysis.

**A.**

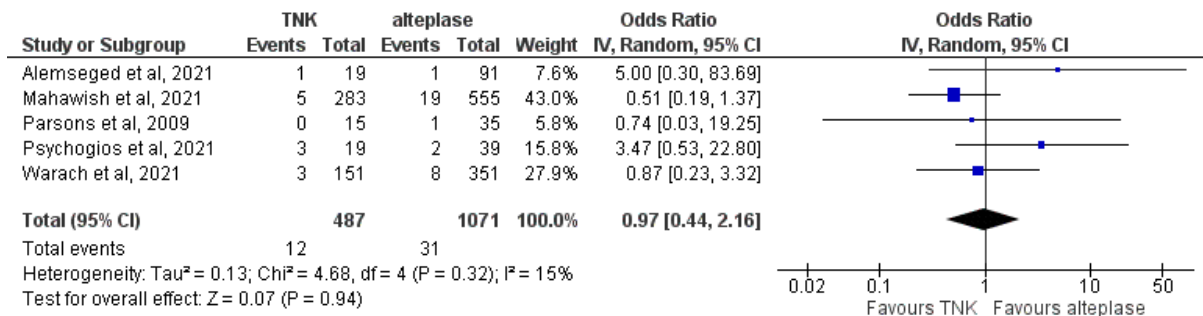

**B.**

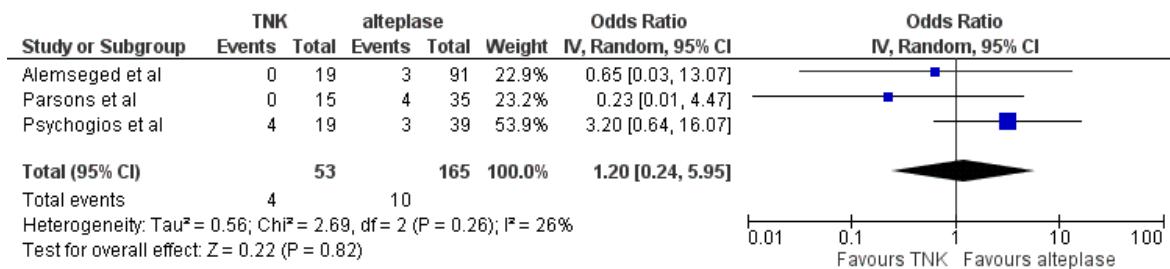

**eFigure 2:** Adjusted analyses on the comparison between tenecteplase and alteplase for the outcomes of symptomatic intracranial hemorrhage following intravenous thrombolysis.

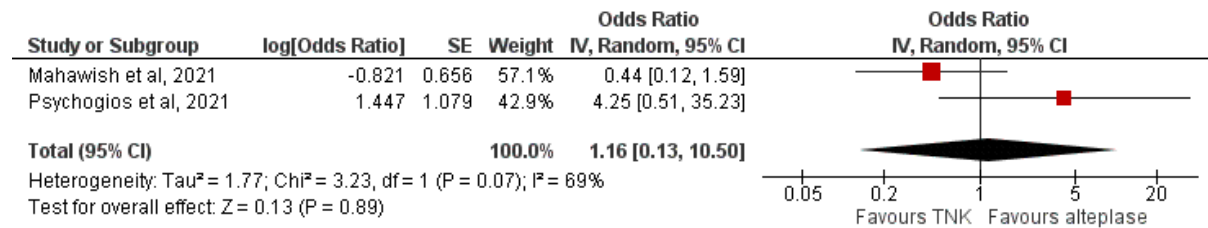



**eFigure 3:** Funnel plots on the (A) unadjusted and (B) adjusted comparison between intravenous tenecteplase and alteplase for the primary outcome of interest (three-month good functional outcome; modified Rankin Scale 0-2)

**A.**

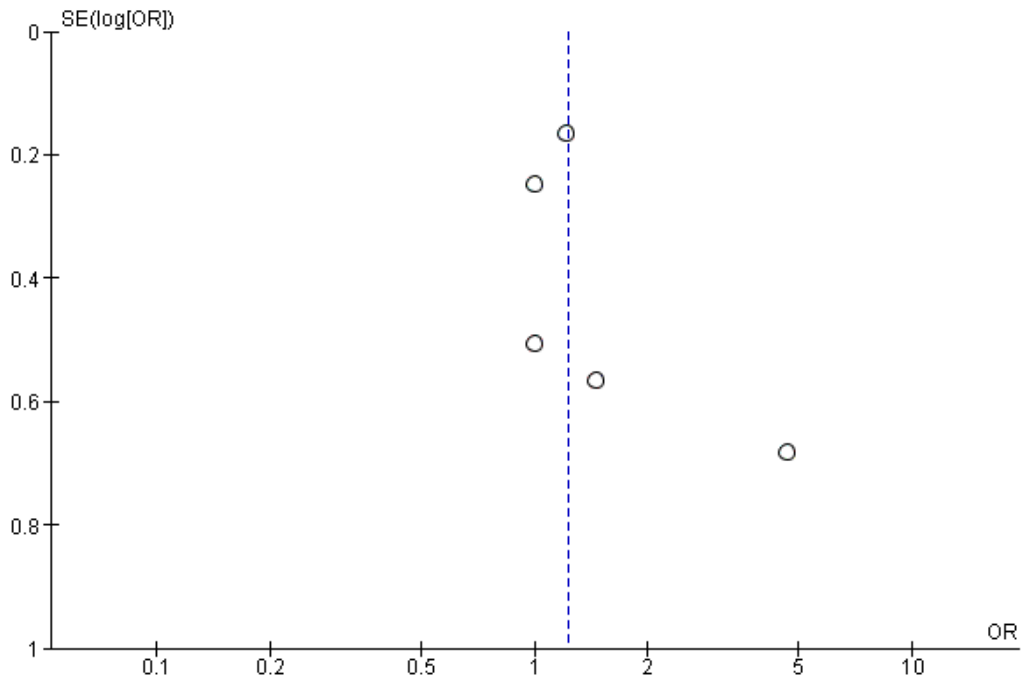

**B.**

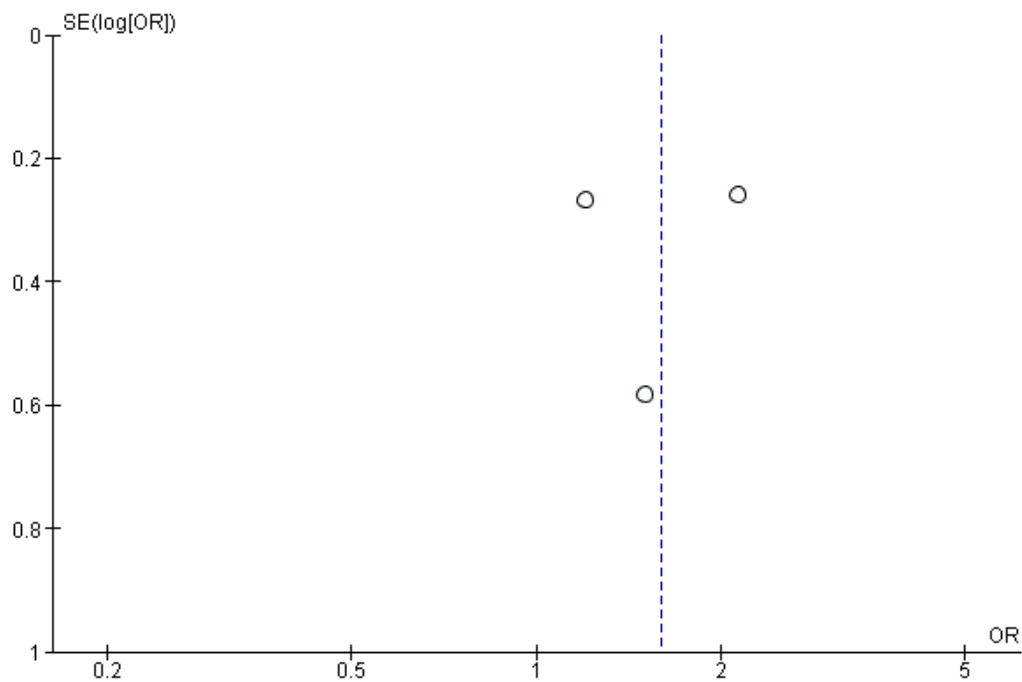

Supplement: jamanetwopen-e224506-s001.pdf [file jamanetwopen-e224506-s001.pdf]
